# Supplementary material
Source: HighWire-hosted journal article supplement (https://www.jneurosci.org/highwire/filestream/597349/field_highwire_adjunct_files/1/Fisher_et_al_Supplementary_Fig_1.pdf)

Closed

Open

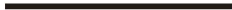

$I_1$

$I_2$

Pore  $\sim 11$  Å

Pore  $\sim 14$  Å

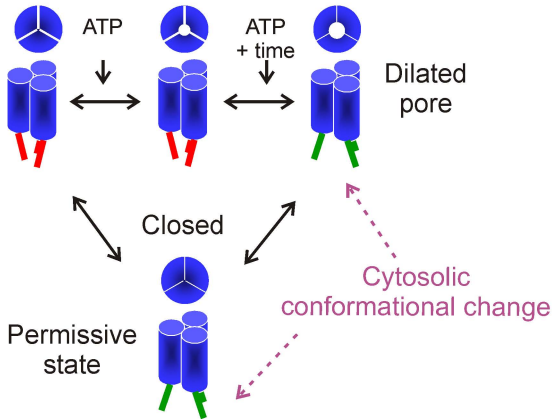

Supplement: Fisher_et_al_Supplementary_Fig_1.pdf [file Fisher_et_al_Supplementary_Fig_1.pdf]
